# Supplementary material
Source: HighWire-hosted journal article supplement (https://erj.ersjournals.com/content/55/4/2000597)
Supplement: inline-supplementary-material-1 [file inline-supplementary-material-1.pdf]

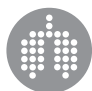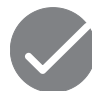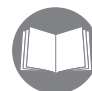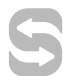

SHAREABLE PDF

# Strategies for the prevention and management of coronavirus disease 2019

Wei-jie Guan<sup>1,3</sup>, Rong-chang Chen<sup>2,3</sup> and Nan-shan Zhong<sup>1</sup>

**Affiliations:** <sup>1</sup>State Key Laboratory of Respiratory Disease, National Clinical Research Center for Respiratory Disease, Guangzhou Institute of Respiratory Health, The First Affiliated Hospital of Guangzhou Medical University, Guangzhou Medical University, Guangzhou, China. <sup>2</sup>Pulmonary and Critical Care Dept, Shenzhen Institute of Respiratory Diseases, First Affiliated Hospital of South University of Science and Technology of China (Shenzhen People's Hospital), Shenzhen, Guangdong, China. <sup>3</sup>Wei-jie Guan and Rong-chang Chen contributed equally to the article.

**Correspondence:** Nan-shan Zhong, State Key Laboratory of Respiratory Disease, National Clinical Research Center for Respiratory Disease, Guangzhou Institute of Respiratory Health, The First Affiliated Hospital of Guangzhou Medical University, 151 Yanjiang Road, Guangzhou, Guangdong, China. E-mail: nanshan@vip.163.com

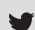

@ERSpublications

**Early protection, early identification, early diagnosis, and early isolation are crucial to combat COVID-19 outbreaks** <https://bit.ly/38ZZYQg>

**Cite this article as:** Guan W-J, Chen R-C, Zhong N-S. Strategies for the prevention and management of coronavirus disease 2019. *Eur Respir J* 2020; 55: 2000597 [<https://doi.org/10.1183/13993003.00597-2020>].

This single-page version can be shared freely online.

Since the outbreak in Wuhan city in December 2019, there has been a surge of newly diagnosed cases with coronavirus disease 2019 (COVID-19) globally [1–4]. The total number has reached to 101 927 laboratory-confirmed cases as of 8 March, 2020 [5]. An increasing number of countries have issued alerts of the highest level.
